# Supplementary material for: The Impact of Drugs on Hydrogen Sulfide Homeostasis in Mammals
Source: MDPI journal article supplement (doi:10.3390/antiox12040908), 2023-04-11
Supplement: s1 [file s1]

Table 1. Studies utilizing animal and/or cell-culture models to explore the impacts of common pharmacological drugs on H<sub>2</sub>S homeostasis.

| Drug used                                                                                                                         | Study type                             | Consequence                                                                                                                                 | Reference |
|-----------------------------------------------------------------------------------------------------------------------------------|----------------------------------------|---------------------------------------------------------------------------------------------------------------------------------------------|-----------|
| NSAID: Indomethacin (10mg/kg/day)<br>and<br>Ketoprofen (30mg/kg/day)                                                              | Animal study: male Wistar rats         | ↓ Gastric H <sub>2</sub> S generation and CSE expression/activity in the gastric mucosa of rat, leading to exacerbate mucosal damage.       | [125]     |
| Aspirin (10mg during five days)                                                                                                   | Animal study: mice                     | ↑ H <sub>2</sub> S in liver and brain of mice.                                                                                              | [126]     |
| NSAID: Diclofenac (50μmol/kg/day)                                                                                                 | Animal study: male Wistar rats         | ↓ Serum H <sub>2</sub> S and ↓ expression of CSE and CBS in the stomach of male Wistar rats                                                 | [127]     |
| NSAID: Aspirin (10mg/kg/ip)                                                                                                       | Animal study: female albino Swiss mice | ↓ H <sub>2</sub> S levels in the liver of animals                                                                                           | [128]     |
| NSAID: Aspirin (10–100mg/kg);<br>Indomethacin (10mg/kg); Diclofenac<br>(100mg/kg); or Ketoprofen (30mg/kg),<br>Aspirin (200mg/kg) | Animal study: mice                     | ↓ CSE expression in the GI tract enhances susceptibility of FXR <sup>-/-</sup> mice to damages caused by Aspirin and NSAIDs                 | [124]     |
|                                                                                                                                   | Animal study: male Sprague-Dawley rats | ↓ H <sub>2</sub> S concentration in gastric tissues but had no effect on plasma H <sub>2</sub> S concentrations                             | [129]     |
| Aspirin<br>(50mg/kg/day)                                                                                                          | Animal study: mice                     | ↓ Gastric expression of CBS and CSE mRNA by 60–70%, leading to gastric injury.                                                              | [130]     |
| Aspirin<br>125mg/kg/ig                                                                                                            | Animal study: Male Wistar rats         | ↓ CSE protein expression and H <sub>2</sub> S production, and ↑ CBS protein expression in gastric mucosal tissues, causing gastric lesions. | [131]     |
| NSAID: Naproxen (20mg/kg/day)                                                                                                     | Animal study: Wistar rats              | ↑ Gastric mucosal protein expression of CSE was observed when compared to controls, while no effect was noticed on CBS and 3-MST.           | [132]     |

| Drug used                                                                     | Study type                           | Consequence                                                                                                                                                        | Reference |
|-------------------------------------------------------------------------------|--------------------------------------|--------------------------------------------------------------------------------------------------------------------------------------------------------------------|-----------|
| Aspirin (200mg/kg/day)                                                        | Animal study: male Kunming mice      | ↓ H <sub>2</sub> S production in the gastric mucosa and caused gastric mucosal injury.<br>↓ gastric GSH levels leading to dysregulate the endogenous redox status. | [133]     |
| NSAID: Ketoprofen (10mg/kg/day)                                               | Animal study: rats                   | ↓ H <sub>2</sub> S levels in the gastric and intestinal mucosa, leading to GI toxicity.                                                                            | [134]     |
| Paracetamol (30mg/kg/d) or (100mg/kg/d)                                       | Animal study: CBA-strain female mice | ↓ brain H <sub>2</sub> S concentration compared to a control group.                                                                                                | [135]     |
| Paracetamol (150mg/kg)                                                        | Animal study: Wistar rats            | ↓ CBS and glutathione synthase enzyme expression in the liver of treated animals                                                                                   | [123]     |
| Paracetamol (150mg/kg/ip)                                                     | Animal study: male C57BL/6J mice     | Animal study: ↓ Protein expression of both CBS and CSE In liver tissues.                                                                                           | [136]     |
| Anticancer drug: Cisplatin (5mg/kg/ip)                                        | Animal study: male Wistar rats       | ↑ H <sub>2</sub> S formation and CSE expression in renal tissues of animals.                                                                                       | [137]     |
| Anticancer drug: Cisplatin (20mg/kg/ip)                                       | Animal study: male C57BL/6 mice      | ↓ both CBS and CSE expression in the kidneys.                                                                                                                      | [138]     |
| Anticancer drug: Cisplatin                                                    | In vivo and In vitro                 | ↓ Expression level of CSE and ↓ H <sub>2</sub> S production in renal cortex tissues, which may contribute to renal toxicity.                                       | [58]      |
| Lipid-lowering drug: Atorvastatin 5mg/kg/day and 20mg/kg/day                  | Animal study: female CBA-strain mice | ↓ H <sub>2</sub> S in the liver tissue (p<0.01), but ↑ H <sub>2</sub> S levels in the kidney, brain, and heart tissues of animals.                                 | [139]     |
| Lipid-lowering drug: Pravastatin (40mg/kg/day) and Atorvastatin (20mg/kg/day) | Animal study: male Wistar rats       | ↑ H <sub>2</sub> S production in the liver of animals by 51.7% and 70.7%.                                                                                          | [140]     |

| Drug used                                                                             | Study type                                                                                                 | Consequence                                                                                                                                                                  | Reference |
|---------------------------------------------------------------------------------------|------------------------------------------------------------------------------------------------------------|------------------------------------------------------------------------------------------------------------------------------------------------------------------------------|-----------|
| Lipid lowering drug: Fluvastatin (5µM) or Atorvastatin (100µM)                        | <i>In vitro</i> : murine raw 264.7 macrophages                                                             | ↑ mRNA and protein expression levels of CSE in concentration and time dependent manners.<br>↑ H <sub>2</sub> S production in raw 264.7 macrophages.                          | [141]     |
| Glucocorticoid: Dexamethasone (1.5mg/kg/day)                                          | Animal study: male Wistar rats                                                                             | ↓ the expression of CBS, CSE and H <sub>2</sub> S production in mesenteries; leading to increase blood pressure.                                                             | [122]     |
| Glucocorticoid: Dexamethasone (1–1,000 nmol/l)                                        | <i>In vitro</i> : macrophages cells                                                                        | ↓ mRNA and protein levels of CSE and H <sub>2</sub> S production in macrophages                                                                                              | [142]     |
| Glucocorticoid: Dexamethasone (Animal study: 1mg/kg, i.p. ( <i>In vitro</i> : 1-10µM) | Animal study: Male Sprague-Dawley rats.<br><i>In vitro</i> : human foetal liver cells and rat neutrophils. | Animal study: ↓ H <sub>2</sub> S concentration in both plasma and tissues.<br><i>In vitro</i> : ↓ expression of CSE in both human foetal liver cells and in rat neutrophils. | [57]      |
| Glucocorticoid: Dexamethasone (10µM)                                                  | <i>In vitro</i> : Chicken myoblasts                                                                        | ↓ expression of the CSE protein in myoblasts.<br>↓ mTOR and p70S6K phosphorylation.<br>↓ protein synthesis.                                                                  | [143]     |
| Glucocorticoid: Dexamethasone (1µM)                                                   | <i>In vitro</i> : Murine calvaria-derived osteoblastic MC3T3-E1 cell line                                  | ↓ expression of both CBS and CSE in osteoblastic.                                                                                                                            | [144]     |
